# Supplementary material for: Impact of Annealing Chemistry on the Properties and Performance of Microporous Annealed Particle Hydrogels
Source: PubMed Central journal article supplement (PMC11388458; doi:10.1021/acs.biomac.4c00465), 2024-08-27
Supplement: bm4c00465_si_001.pdf [file bm4c00465_si_001.pdf]

## SUPPORTING INFORMATION

### Impact of Annealing Chemistry on the Properties and Performance of Microporous Annealed Particle Hydrogels

Sarea Y. Recalde Phillips<sup>1</sup>, Kiara D. Perez-Ponce<sup>1</sup>, Elizabeth Ruben<sup>1</sup>, Talia Baig<sup>1</sup>, Emily Poux<sup>2</sup>, Carl A. Gregory<sup>1,3</sup>, Daniel L. Alge<sup>1,4\*</sup>

<sup>1</sup>Department of Biomedical Engineering, Texas A&M University, College Station, TX 77843, United States

<sup>2</sup>Department of Chemical Engineering, Texas A&M University, College Station, TX 77843, United States

<sup>3</sup>Department of Cell Biology and Genetics, School of Medicine, Texas A&M University, Bryan, TX 77807, United States

<sup>4</sup>Department of Materials Science and Engineering, Texas A&M University, College Station, TX 77843, United States

\*Email: dalge@tamu.edu

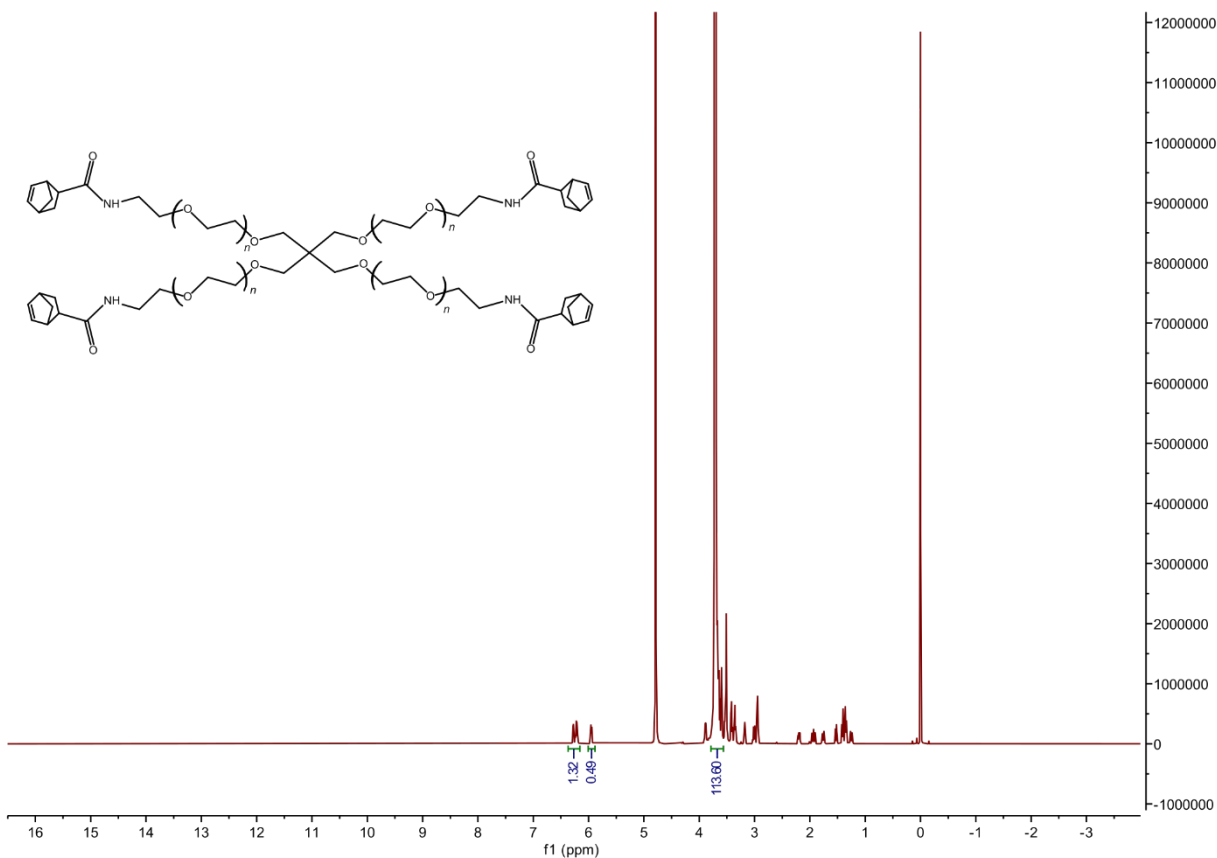

**Figure S1.** <sup>1</sup>H NMR spectrum of norbornene-functionalized PEG (MW = 5kDa). PEG was dissolved in D<sub>2</sub>O, and functionalization was calculated by normalizing the alkene protons from the norbornene end group ( $\delta = 6.22 - 6.06$ ) to the PEG ( $\delta = 3.7 - 3.6$ ).

| Microgel Type | PEG-aNB [mM] | KCGPQGIWGQCK [mM] | CGRGDS [mM] | LAP [mM] |
|---------------|--------------|-------------------|-------------|----------|
| 5kDa          | 18.25        | 24.27             | 1           | 10       |
| 20 kDa        | 4.88         | 6.82              | 1           | 10       |

**Table S1.** Microgel formulation used during electro spraying. A thiol:norbornene ratio of 0.75:1 was maintained across microgel formulations to ensure that excess norbornenes would be available for annealing of TzMAP and ThiolMAP hydrogels.

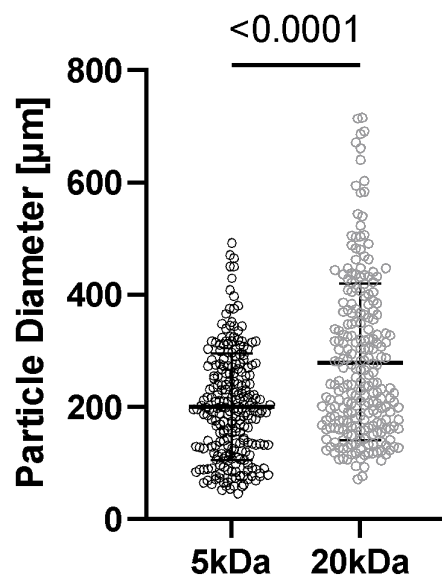

**Figure S2.** Diameter of 5kDa and 20kDa microgels used for MAP hydrogel assembly. Data is represented as mean  $\pm$  standard deviation. n = 234.

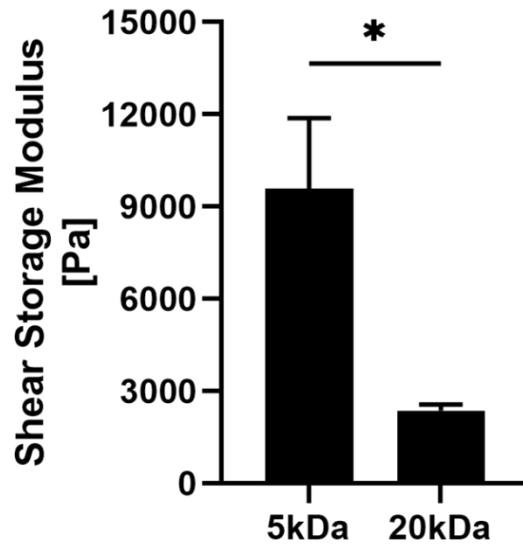

**Figure S3.** Shear storage modulus of 5kDa and 20kDa bulk hydrogels. Hydrogels were formed using the same formulations as were used for microparticle synthesis. Specifically, 10wt% PEG pre-polymer solutions containing a 0.75:1 thiol:norbornene ratio were irradiated in 8mm-diameter molds for 5min at 60mW/cm<sup>2</sup>. Hydrogels were swelled overnight in PBS prior to rheology. Data is represented as mean ± standard deviation. \*p < 0.05. n = 3 hydrogels.

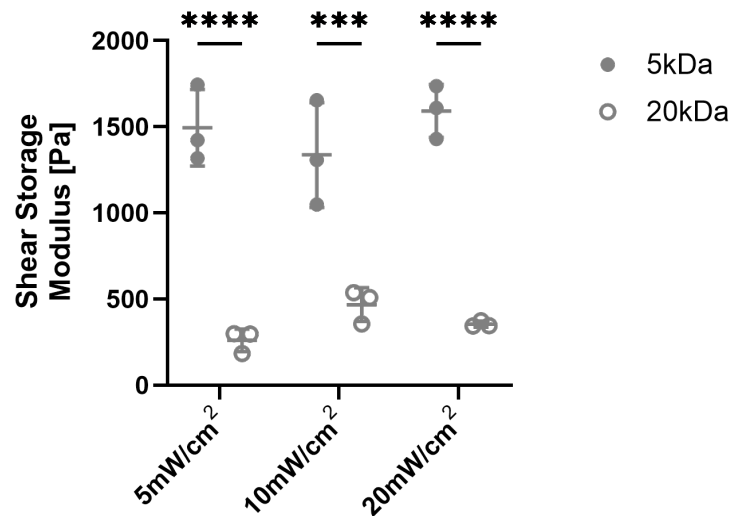

**Figure S4.** Shear storage modulus of 5kDa and 20kDa ThiolMAP hydrogels assembled with varying light intensity. Data is represented as mean ± standard deviation. \*\*\*\* = p < 0.0001. n = 3 hydrogels.

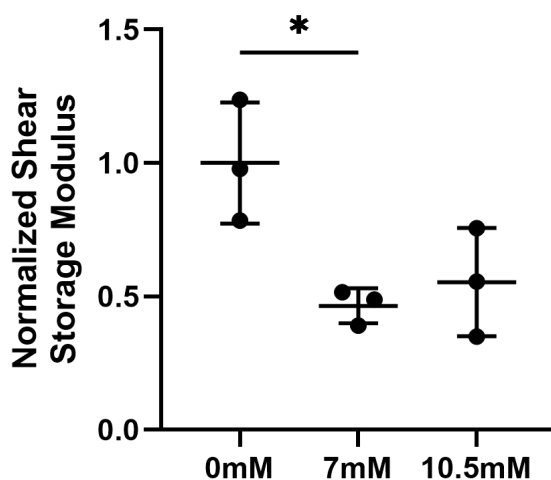

**Figure S5.** Impact of available norbornene groups on TzMAP shear storage modulus. Unreacted norbornene groups on 5 kDa microgels were capped through photopolymerization at 10mW/cm<sup>2</sup> in 1mM LAP and varying concentrations of L-cysteine. Microgels were subsequently used to anneal TzMAP hydrogels with PEG-di-Tz. Data were normalized to the average modulus of the uncapped group and are represented as mean  $\pm$  standard deviation. \* =  $p < 0.05$ .  $n = 3$  hydrogels.

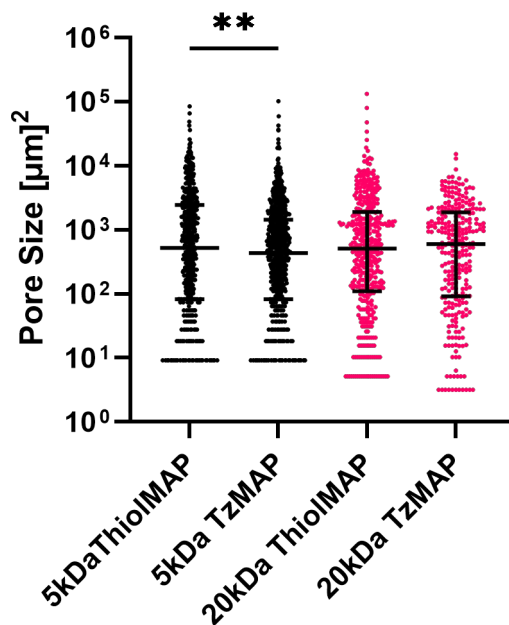

**Figure S6.** Distribution of pore size area in 5kDa and 20kDa MAP hydrogels. Data points represent individual pores, and the error bars represent the median and interquartile ranges. \*\* $p < 0.01$ .  $n = 3$  hydrogels.

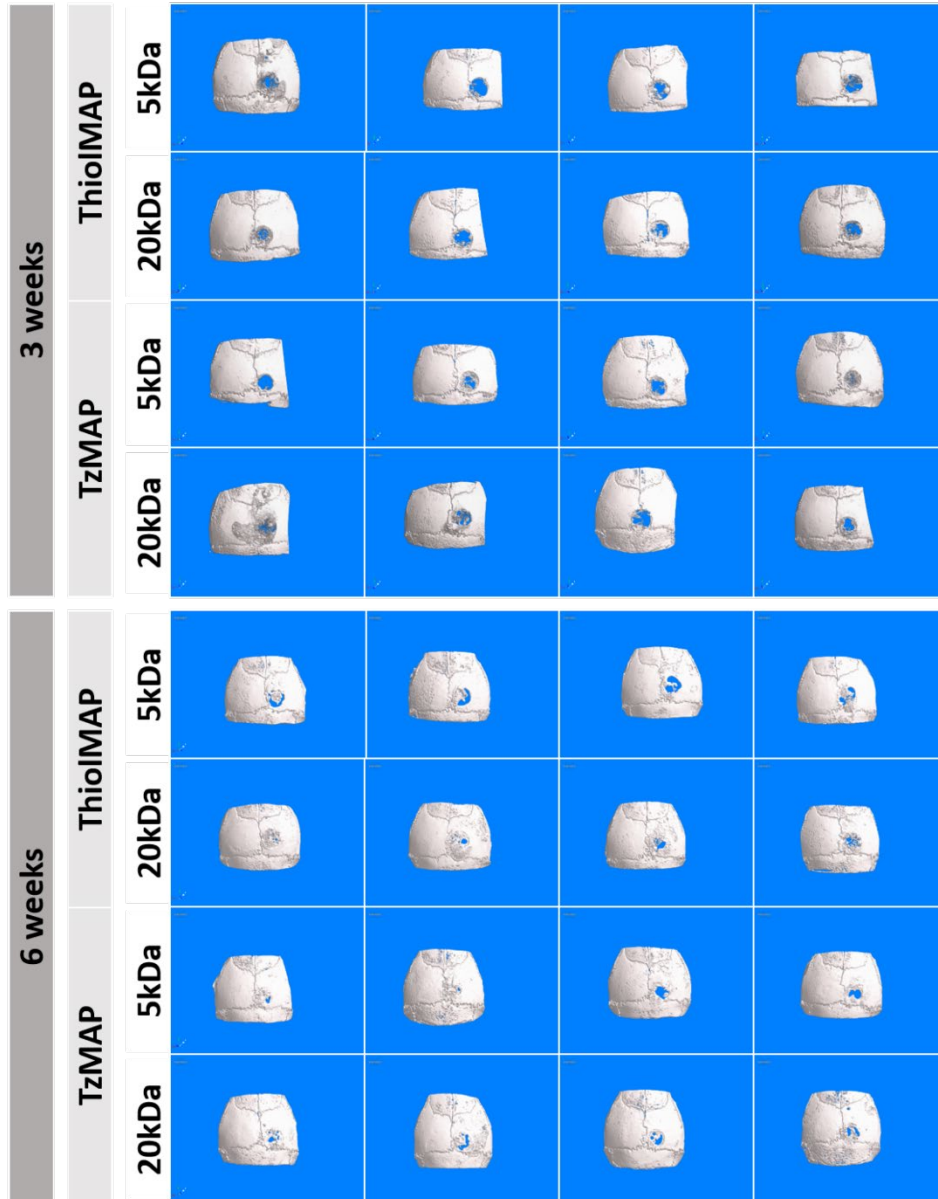

**Figure S7.** 3D reconstructions of calvarial samples 3 and 6 weeks post-implantation of TzMAP and ThioIMAP hydrogels. Images were generated from scans obtained from the Skyscan instrument. Displayed reconstructions represent the calvarium of each mouse used during the study.

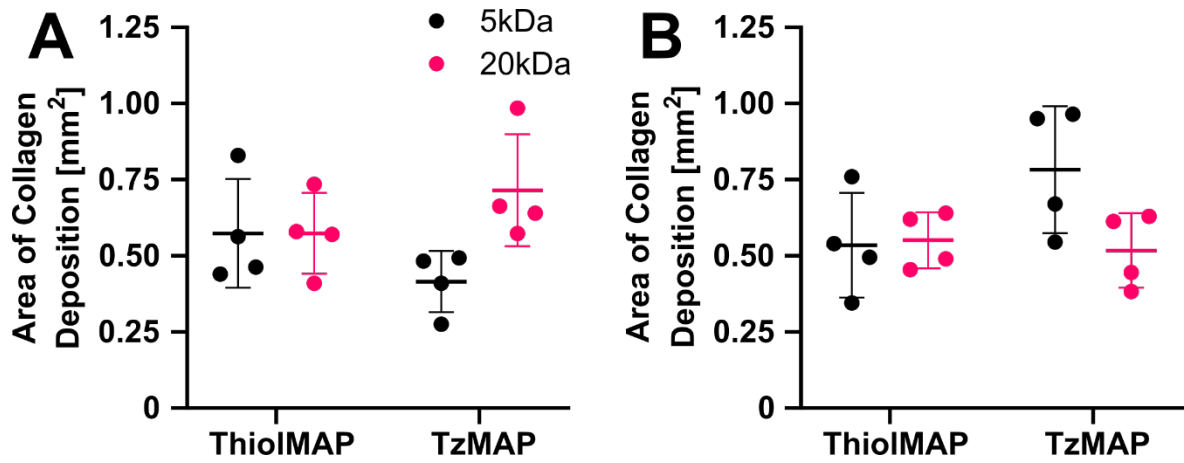

**Figure S8.** Collagen deposition at defect sites (A) 3 weeks and (B) 6 weeks post-implantation of TzMAP and ThioIMAP hydrogels. Data is represented as mean  $\pm$  standard deviation.  $n = 4$ .
